# Supplementary material for: Emodin via colonic irrigation modulates gut microbiota and reduces uremic toxins in rats with chronic kidney disease
Source: PubMed Central journal article supplement (PMC4951226; doi:10.18632/oncotarget.8160), 2016-03-17
Supplement: oncotarget-07-17468-s001.pdf [file oncotarget-07-17468-s001.pdf]

# Emodin *via* colonic irrigation modulates gut microbiota and reduces uremic toxins in rats with chronic kidney disease

## Supplementary Material

**Supplementary Table S1 Alpha diversity analyses of samples**

| Sample ID | Chao1 | Simpson | Shannon | OTUs | PD <sup>a</sup> |
|-----------|-------|---------|---------|------|-----------------|
| CTL01     | 1346  | 0.97    | 6.8     | 459  | 46              |
| CTL02     | 1516  | 0.98    | 7.4     | 531  | 55              |
| CTL03     | 458   | 0.97    | 6.3     | 247  | 28              |
| CTL04     | 1026  | 0.92    | 6.3     | 419  | 44              |
| CTL05     | 1361  | 0.97    | 7.3     | 494  | 53              |
| CTL06     | 907   | 0.85    | 5.5     | 359  | 39              |
| CTL07     | 1116  | 0.86    | 5.8     | 428  | 45              |
| CTL08     | 1131  | 0.97    | 6.8     | 409  | 41              |
| CTL09     | 965   | 0.97    | 6.8     | 419  | 43              |
| CTL10     | 1249  | 0.97    | 6.7     | 406  | 41              |
| CTL11     | 793   | 0.97    | 6.8     | 350  | 39              |
| CTL12     | 793   | 0.97    | 6.6     | 356  | 36              |
| CTL13     | 511   | 0.71    | 4.0     | 244  | 31              |
| CCI01     | 1342  | 0.98    | 7.1     | 457  | 48              |
| CCI02     | 405   | 0.96    | 6.0     | 237  | 28              |
| CCI03     | 472   | 0.98    | 6.7     | 259  | 29              |
| CCI04     | 433   | 0.97    | 6.2     | 240  | 28              |
| CCI05     | 1316  | 0.99    | 7.5     | 478  | 47              |
| CCI06     | 1564  | 0.98    | 7.3     | 509  | 49              |
| CCI07     | 477   | 0.97    | 6.5     | 252  | 28              |
| CCI08     | 470   | 0.98    | 6.8     | 281  | 31              |
| CCI09     | 1322  | 0.97    | 7.0     | 482  | 50              |
| ECI01     | 1540  | 0.98    | 7.0     | 455  | 47              |
| ECI02     | 1997  | 0.99    | 7.9     | 622  | 60              |
| ECI03     | 1114  | 0.98    | 7.3     | 459  | 48              |
| ECI04     | 993   | 0.98    | 7.3     | 485  | 50              |
| ECI05     | 1806  | 0.99    | 7.7     | 575  | 57              |
| ECI06     | 1532  | 0.98    | 7.6     | 547  | 56              |
| ECI07     | 1407  | 0.98    | 7.1     | 465  | 46              |
| ECI08     | 1313  | 0.98    | 7.1     | 465  | 48              |
| ECI09     | 1711  | 0.98    | 7.4     | 558  | 55              |

a. PD is an abbreviation for phylogenetic diversity.

### Supplementary Table S2 Mass transitions and compound parameters

|                     | Q1 (m/z) | Q3 (m/z) | DP   | FP   | EP  | CE  | CXP |
|---------------------|----------|----------|------|------|-----|-----|-----|
| IS                  | 212      | 81       | -25  | -150 | -4  | -33 | -10 |
| hydrochlorothiazide | 296      | 269      | -120 | -200 | -10 | -27 | -6  |

DP, declustering potential; FP, potential; EP, entrance potential; CE, collision energy; CXP, collision exit potential.

**Supplementary Table S3 Primers and products used in the real-time qPCR**

| Targer bacteria         | Primer  | Sequence(5'-3')            | Product size(bp) | Reference |
|-------------------------|---------|----------------------------|------------------|-----------|
| Escherichia coli        | Forward | CATGCCGCGTGTATGAAGAA       | 95               | 1         |
|                         | Reverse | CGGGTAACGTCAATGAGCAAA      |                  |           |
| Lactobacillus spp.      | Forward | TGGATGCCTTGGCAC TAGGA      | 92               | 2         |
|                         | Reverse | AAATCTCCGGATCAAAGCTTACTTAT |                  |           |
| Bifidbacteria spp.      | Forward | GCGTGCTTAACACATGCAAGTC     | 124              | 3         |
|                         | Reverse | CACCCGTTTCCAGGAGCTATT      |                  |           |
| Bacteroides.fragilis    | Forward | GAGAGGAAGGTCCCCCAC         | 106              | 4         |
|                         | Reverse | CGTACTTGGCTGGTTCAG         |                  |           |
| Enteroroccus spp.       | Forward | CCCTTATTGTTAGTTGCCATCATT   | 144              | 5         |
|                         | Reverse | ACTCGTTGTACTIONCCATTGT     |                  |           |
| Clostridium perfringens | Forward | ATGCAAGTCGAGCGATG          | 120              | 5         |
|                         | Reverse | TATGCGGTATTAATCTTCCTTT     |                  |           |
| All bacteria            | Forward | TCCTACGGGAGGCAGCAGT        | 466              | 6         |
|                         | Reverse | GGACTACCAGGGTATCTAATCCTGTT |                  |           |

**Table S4 Standard bacterial strains in this study**

| Organism                        | strain <sup>a</sup> |
|---------------------------------|---------------------|
| <i>Escherichia coli</i>         | ATCC25922           |
| <i>Bifidobacterium longum</i>   | ATCC15707           |
| <i>Enterococcus faecalis</i>    | ATCC29212           |
| <i>Lactobacillus bulgaricus</i> | ACCC10638           |
| <i>Clostridium perfringens</i>  | ATCC13124           |
| <i>Bacteroides fragilis</i>     | ATCC25283           |

<sup>a</sup> ATCC, American Type Culture Collection; ACCC, Agricultural Culture Collection of China

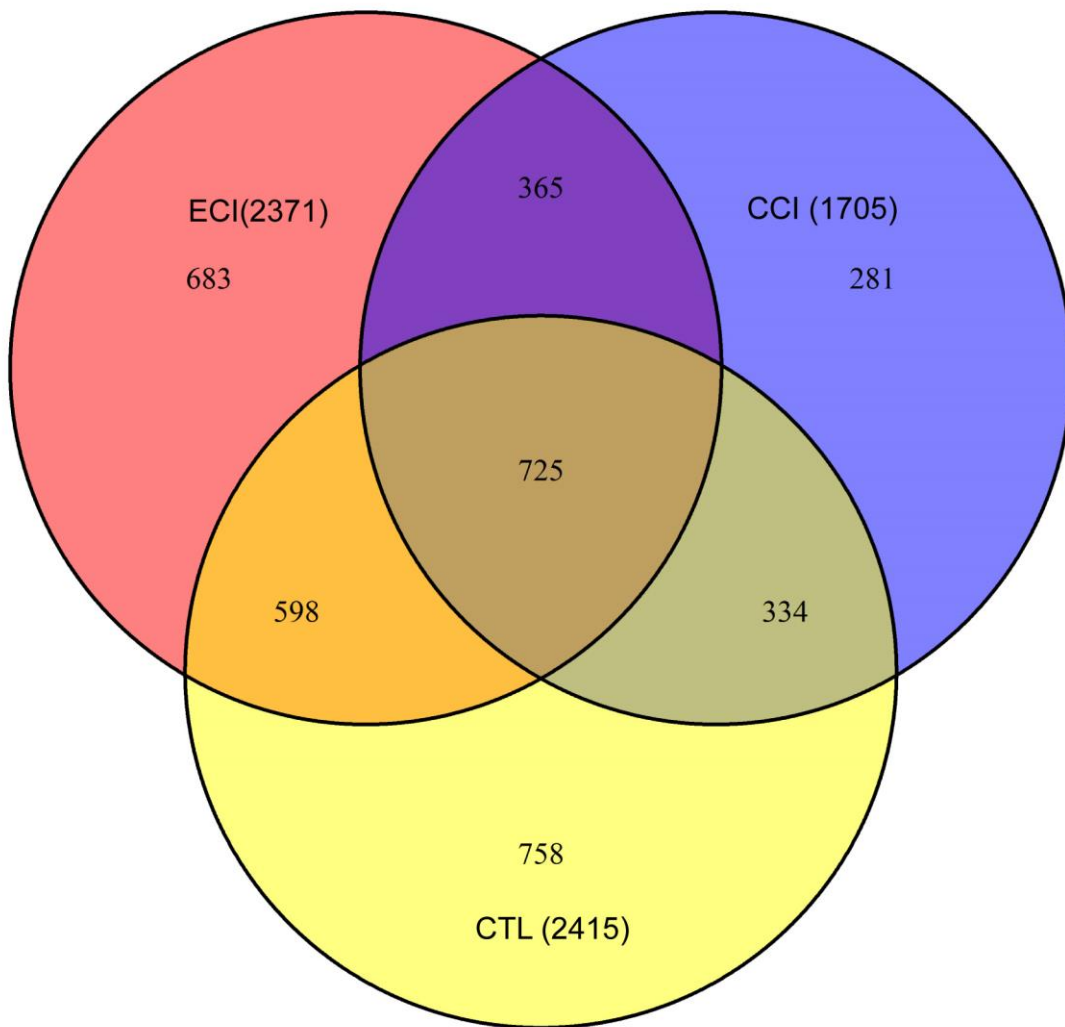

**Supplementary Figure S1 Venn diagrams of numbers of OTUs common or unique to each group.**

Each circle represents a group. The interior of each circle represents the number of OTUs in each group.

The overlapping areas represent the set of OTUs commonly present in some counterpart groups. The

single-layer zone represents the number of OTUs specifically found in a particular group.

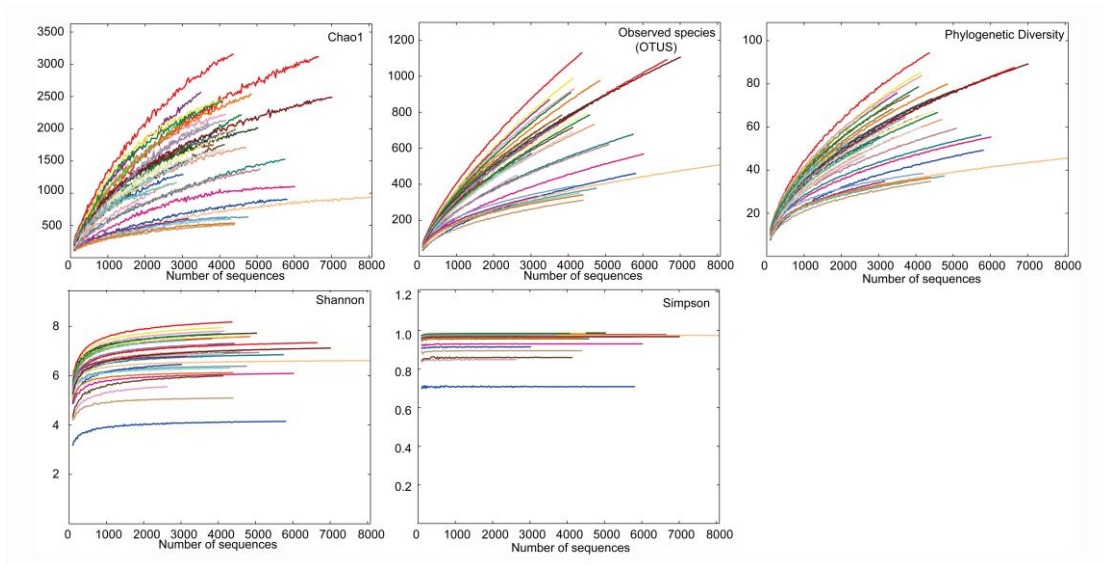

**Supplementary Figure S2 Rarefaction curves.** Rarefaction measurements of the gut microbiota with Chao1, Observed species (OTUs), phylogenetic diversity, Shannon and Simpson show the diversities of OTUs in each sample.

## References

1. Huijsdens XW, Linskens RK, Mak M, Meuwissen SG *et al.* Quantification of bacteria adherent to gastrointestinal mucosa by real-time PCR. *J Clin Microbiol.* **40**, 4423-4427(2002).
2. Haarman M, Knol J. Quantitative real-time PCR analysis of fecal Lactobacillus species in infants receiving a prebiotic infant formula. *Appl Environ Microbiol.* **72**, 2359-2365(2006).
3. Penders J, Vink C, Driessen C, London N *et al.* Quantification of Bifidobacterium spp., Escherichia coli and Clostridium difficile in faecal samples of breast-fed and formula-fed infants by real-time PCR. *Fems Microbiol Lett.* **243**, 141-147(2005).
4. Layton A, McKay L, Williams D, Garrett V *et al.* Development of Bacteroides 16S rRNA gene TaqMan-based real-time PCR assays for estimation of total, human, and bovine fecal pollution in water. *Appl Environ Microbiol.* **72**, 4214-4224(2006).
5. Rinttila T, Kassinen A, Malinen E, Krogus L *et al.* Development of an extensive set of 16S rDNA-targeted primers for quantification of pathogenic and indigenous bacteria in faecal samples by real-time PCR. *J Appl Microbiol.* **97**, 1166-1177(2004).
6. Nadkarni MA, Martin FE, Jacques NA, Hunter N. Determination of bacterial load by real-time PCR using a broad-range (universal) probe and primers set. *Microbiology+*. **148**, 257-266(2002).
